# Supplementary material
Source: Springer Nature journal article supplement (https://www.springermedizin.de/resource/supplementary/13034_2013_242_MOESM4_ESM.pdf/9652614)

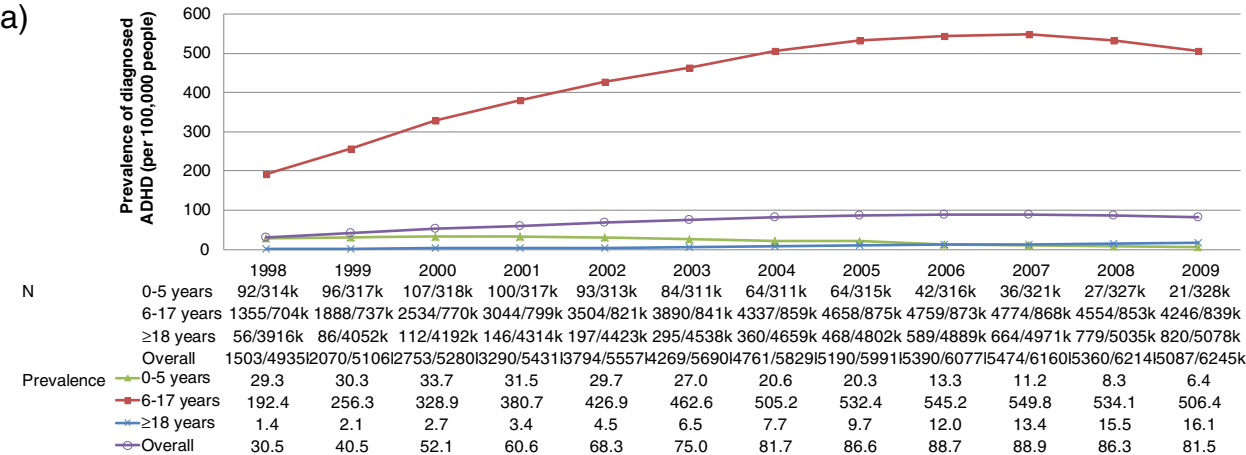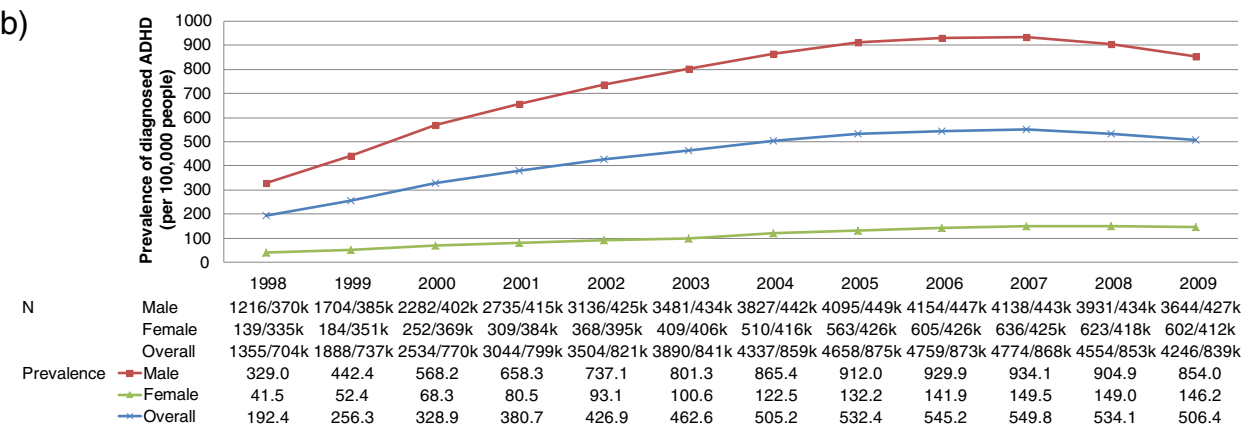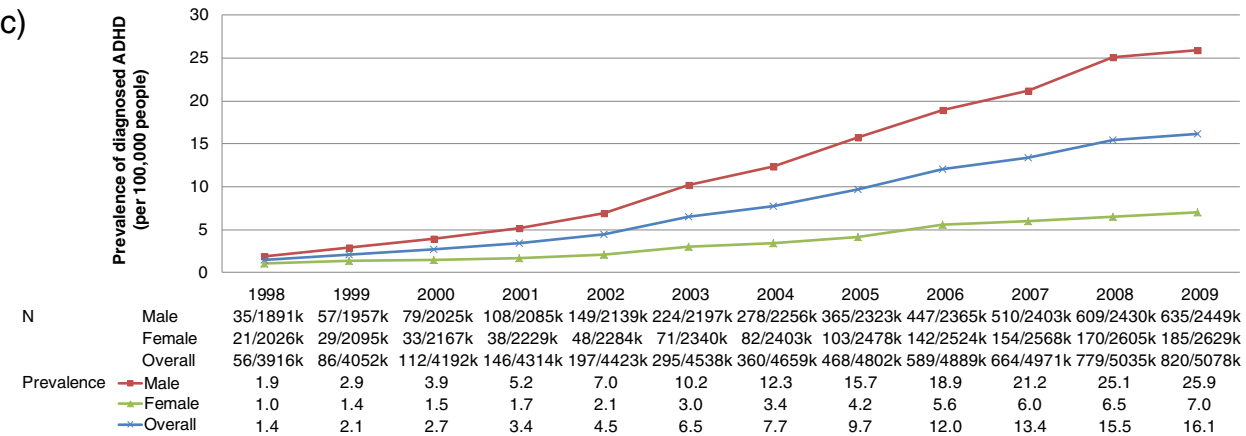

Supplement: MOESM4 [file 9652614]
